# Supplementary material for: Cardiolipin, and not monolysocardiolipin, preferentially binds to the interface of complexes III and IV
Source: Royal Society of Chemistry journal article supplement (doi:10.1039/d2sc04072g), 2022-01-01
Supplement: d2sc04072g8.pdf [file d2sc04072g8.pdf]

## Cardiolipin, and not monolysocardiolipin, preferentially binds to the interface of Complexes III and IV

Robin A. Corey, Noah Harrison, Phillip J. Stansfeld, Mark S.P. Sansom, Anna Duncan

### Supplementary Data

1. Coordinates of CL and MLCL binding sites, as identified by PyLipID, for yeast, mouse and human supercomplexes (6 files)
2. Itp file for CL > MLCL used for FEP

### Supplementary Figures

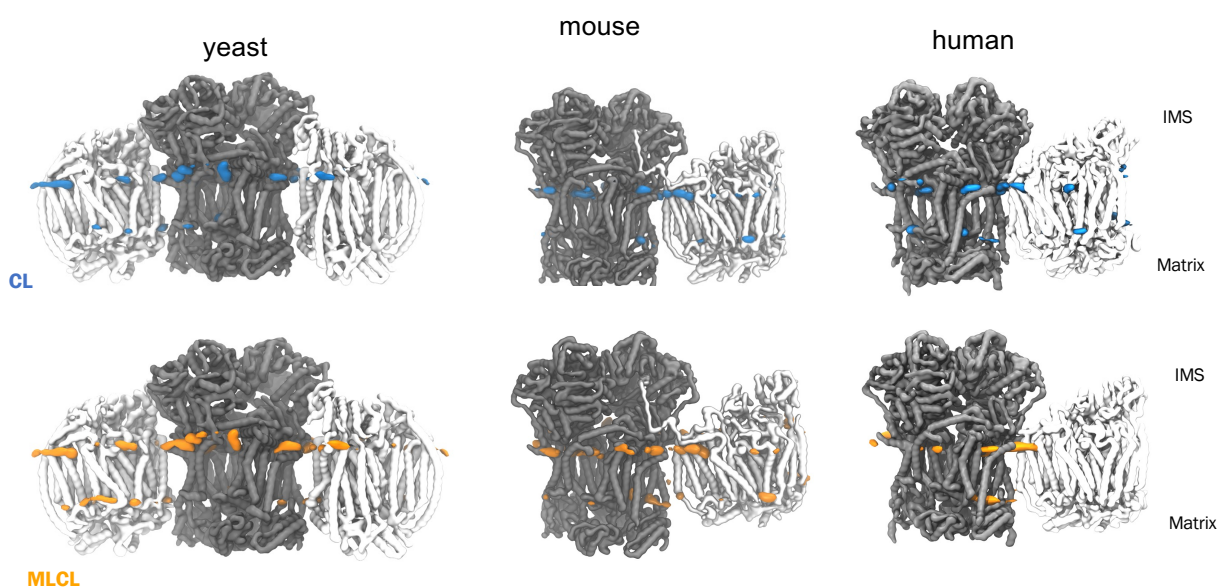

**Figure S1.** CL (top row) and MLCL (second row) headgroup density from yeast, mouse and human CIII<sub>2</sub>CIV<sub>1-2</sub> CG MD simulations. CIII backbone is shown in grey and CIV in white, with CL headgroup densities in blue and MLCL densities in orange.

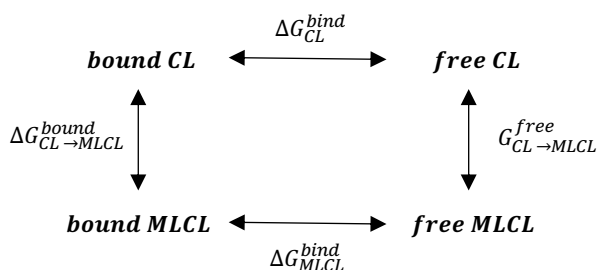

$$\begin{aligned}\Delta\Delta G &= \Delta G_{CL}^{bind} - \Delta G_{MLCL}^{bind} \\ &= \Delta G_{CL \rightarrow MLCL}^{bound} - \Delta G_{CL \rightarrow MLCL}^{free}\end{aligned}$$

**Figure S2.** Thermodynamic cycle used for the free energy perturbation simulations.

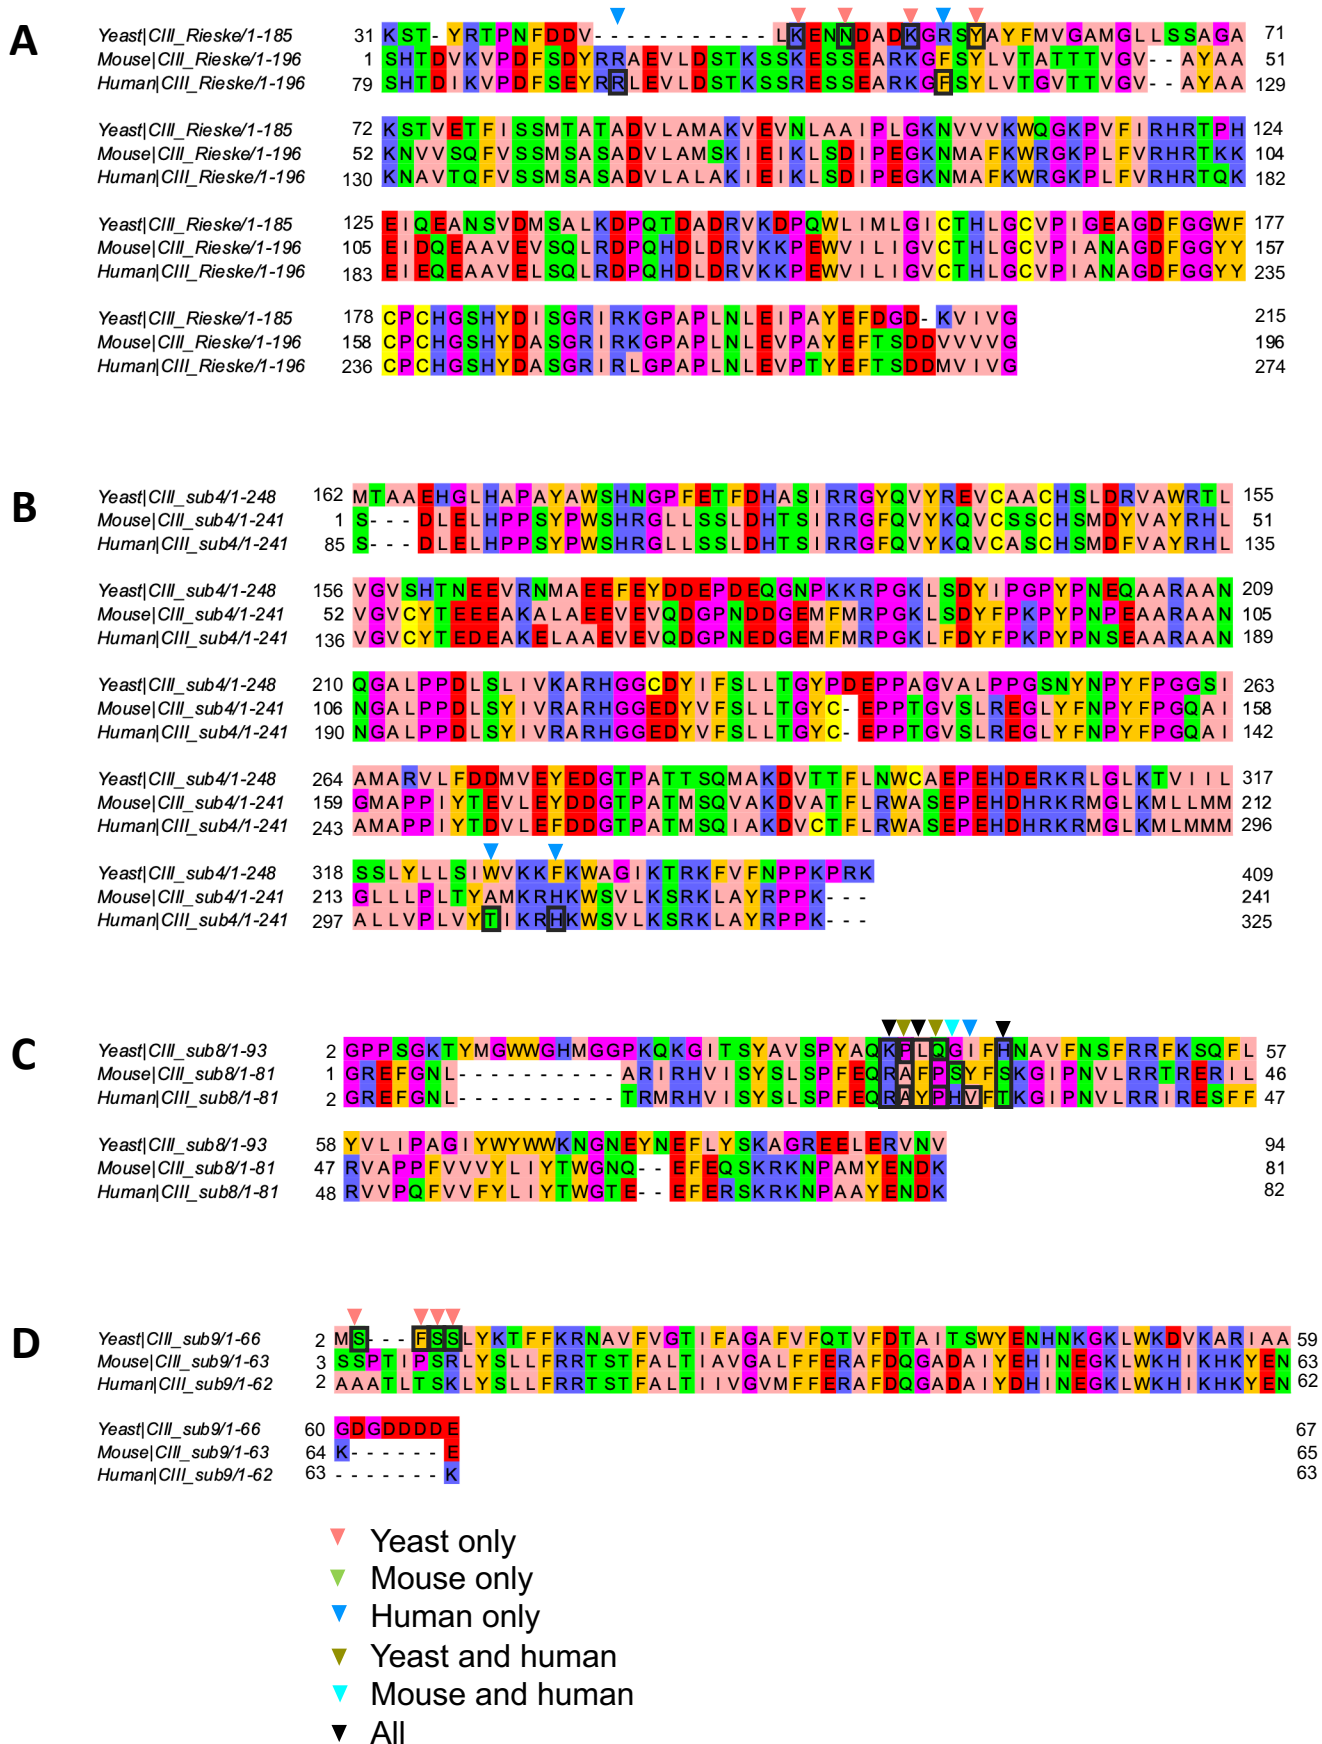

**Figure S3.** Sequence alignment of the yeast, mouse and human subunits of Complex III that were engaged in MLCL or CL interactions during simulations, showing **A)** the Rieske subunit; **B)** subunit 4; **C)** subunit 8; and **D)** subunit 9. Residues identified as being in the interface interaction site with occupancy > 40 % (see also Table 2) are indicated on the sequence alignment by a black outline and arrow (arrow colour shows the species involved in the interaction)

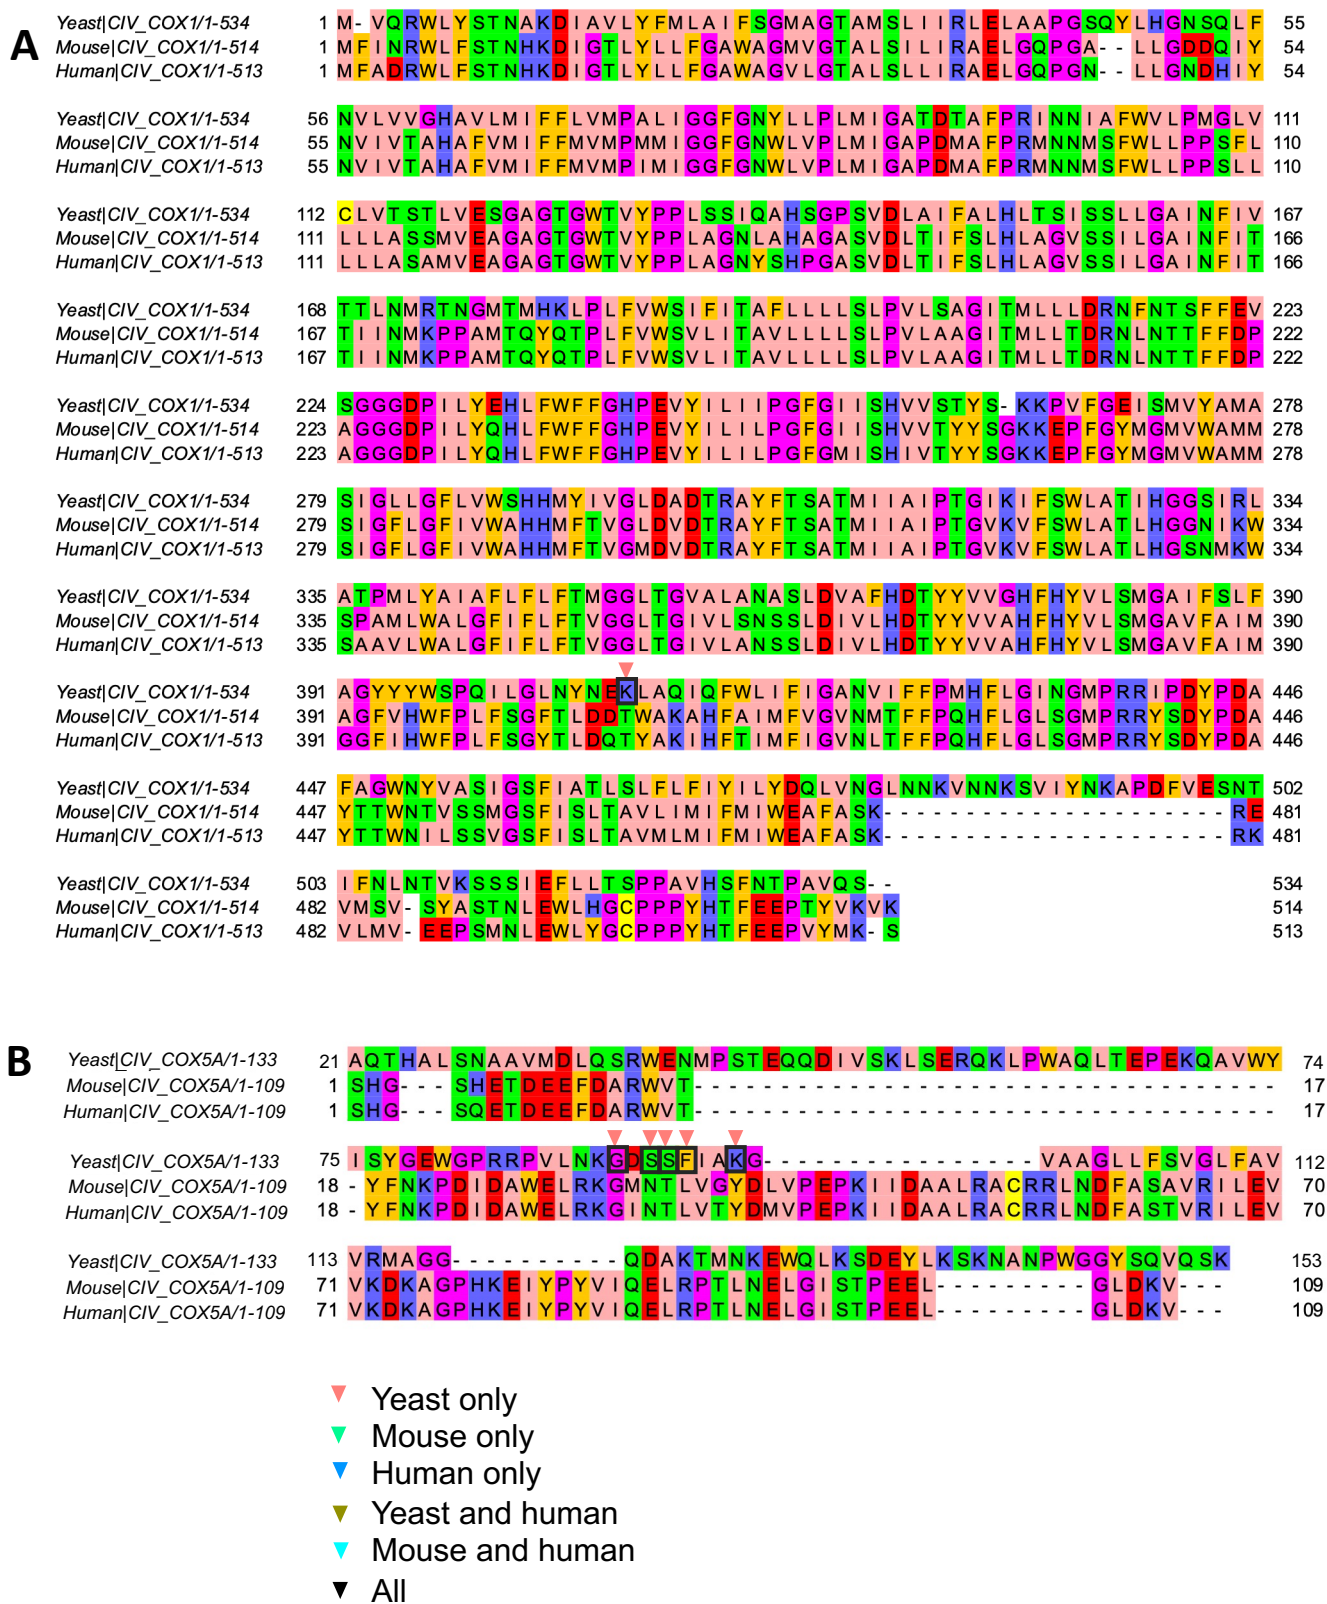

**Figure S4.** Sequence alignment of the yeast, mouse and human **A)** COX1; **B)** COX5A subunits of CIV. Together with Figure S5, these comprise all the subunits of CIV that were engaged in MLCL or CL interactions during simulations. Residues identified as being in the interface interaction site with occupancy > 40 % (see also Table 2) are indicated on the sequence alignment by a black outline and arrow (arrow colour shows the species involved in the interaction)

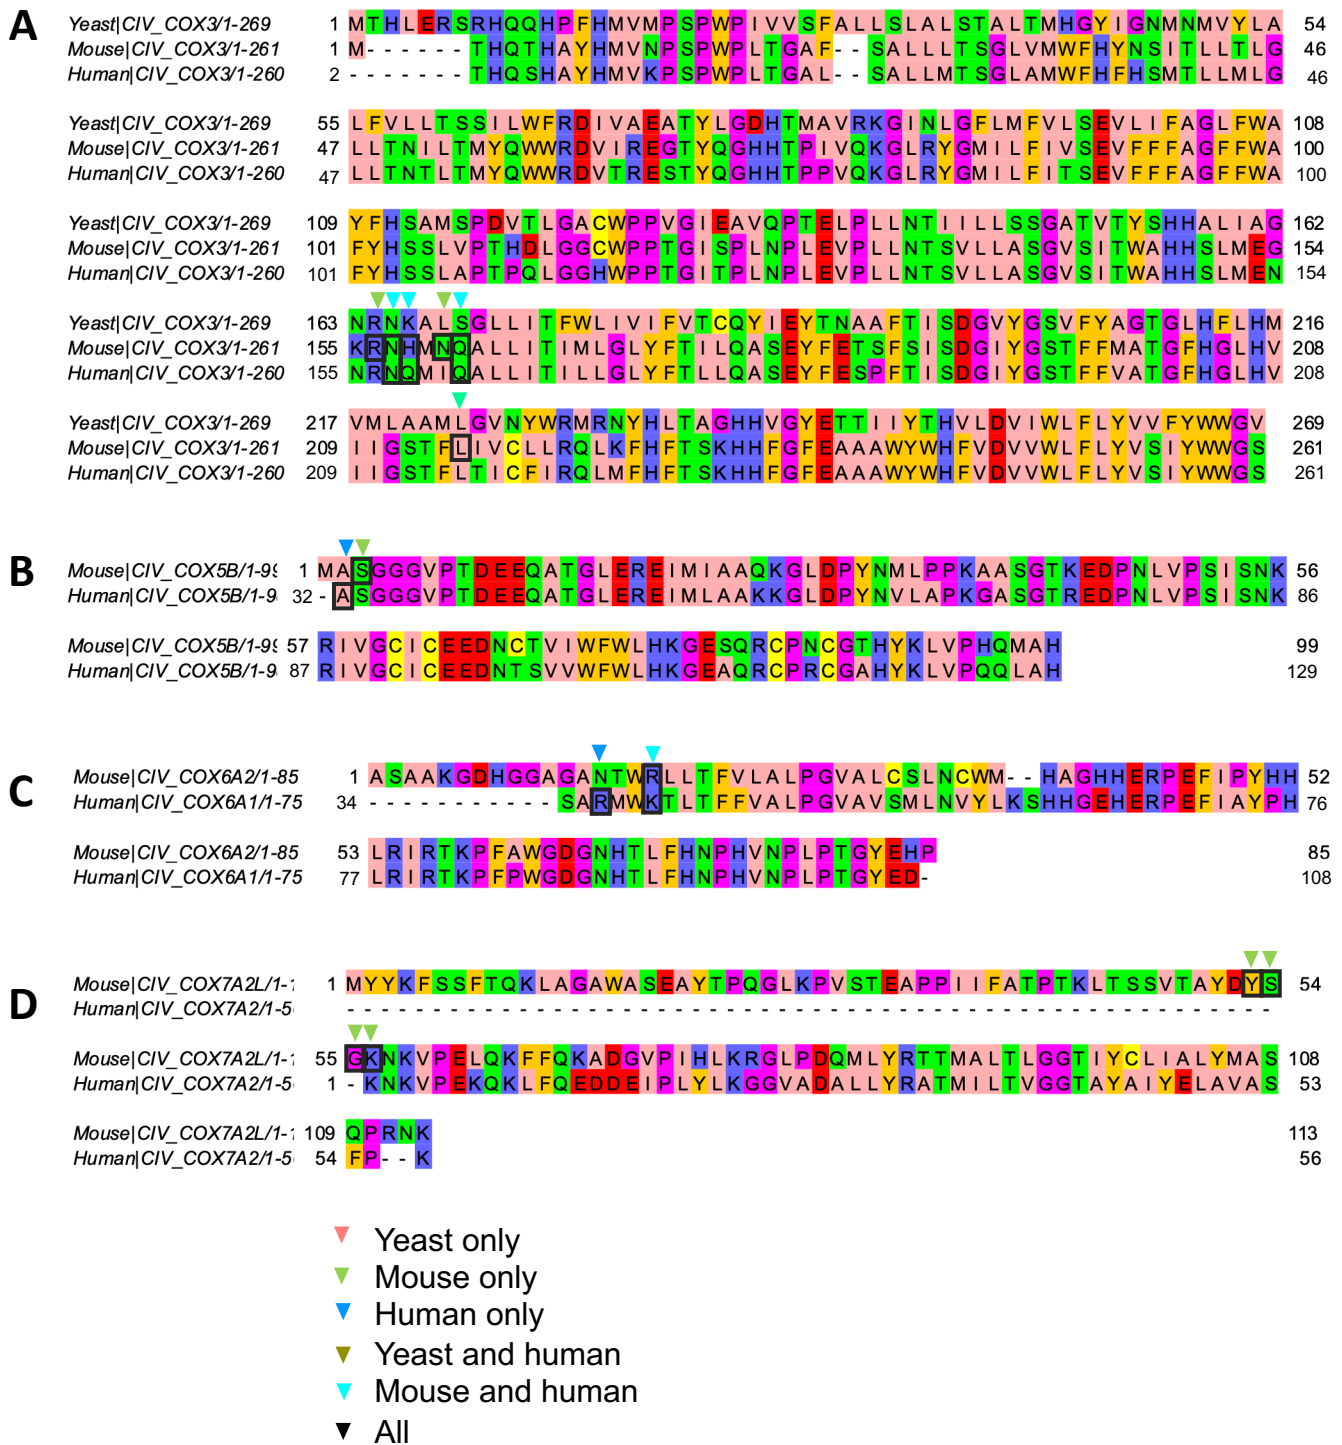

**Figure S5.** Sequence alignment of the yeast (*S. cerevisiae*), mouse and human **A**) COX3; and mouse and human **B**) COX5B; **C**) COX6A; and **D**) COX7A2 subunits of CIV. Note that yeast CIV does not contain subunits COX5B, COOX6A, nor COX7A2. Together with Figure S4, these comprise all the subunits of CIV that were engaged in MLCL or CL interactions during simulations. Residues identified as being in the interface interaction site with occupancy > 40 % (see also Table 2) are indicated on the sequence alignment by a black outline and arrow (arrow colour shows the species involved in the interaction)

**Table S1.** Residence time and occupancy for each interface site overall, and individually for each residue within the site, as listed in Table 2

| Lipid                | Complex and Subunit | Residue | Res. time ( $\mu$ s) | Occupancy (%) | Lipid        | Complex and Subunit | Residue | Res. time ( $\mu$ s) | Occupancy (%)  |        |       |       |       |
|----------------------|---------------------|---------|----------------------|---------------|--------------|---------------------|---------|----------------------|----------------|--------|-------|-------|-------|
| <b>Yeast</b>         |                     |         |                      |               | <b>Mouse</b> |                     |         |                      |                |        |       |       |       |
| <b>CL (Site 1)</b>   |                     |         |                      |               | <b>CL</b>    |                     |         |                      |                |        |       |       |       |
|                      |                     |         | Overall: 11.14       | 98.46         |              |                     |         | Overall: 15.00       | 100.00         |        |       |       |       |
|                      | CIII                | Rieske  | K44                  | 8.87          | 48.57        |                     | CIII    | Sub 8                | R24            | 8.18   | 71.74 |       |       |
|                      |                     |         | K51                  | 1.91          | 73.51        |                     |         |                      | F26            | 6.36   | 62.03 |       |       |
|                      |                     | Sub 8   | K35                  | 3.89          | 42.83        |                     |         |                      | S28            | 6.23   | 65.56 |       |       |
|                      |                     | Sub 9   | S2                   | 0.69          | 84.99        |                     |         |                      | S31            | 2.71   | 56.95 |       |       |
|                      |                     |         | F3                   | 0.59          | 43.05        |                     | CIV     | COX3                 | R156           | 2.21   | 48.79 |       |       |
|                      |                     |         | S4                   | 0.63          | 53.20        |                     |         |                      | N157           | 15.00  | 89.18 |       |       |
|                      |                     |         | S5                   | 0.70          | 66.89        |                     |         |                      | H158           | 8.07   | 66.67 |       |       |
|                      | CIV                 | COX5A   | S93                  | 7.48          | 45.48        |                     |         |                      | Q161           | 7.71   | 60.93 |       |       |
|                      |                     |         | F94                  | 3.92          | 43.49        |                     |         |                      | L223           | 14.43  | 59.16 |       |       |
|                      |                     |         | K97                  | 3.89          | 40.40        |                     |         | COX5B                | S3             | 8.19   | 71.08 |       |       |
|                      |                     |         |                      |               |              |                     |         | COX6A2               | R17            | 6.55   | 56.51 |       |       |
|                      |                     |         |                      |               |              |                     |         | COX7A2L              | S54            | 2.59   | 75.94 |       |       |
|                      |                     |         |                      |               |              |                     |         |                      | G55            | 2.71   | 62.69 |       |       |
|                      |                     |         |                      |               |              |                     |         |                      | K56            | 1.97   | 96.47 |       |       |
| <b>CL (Site 2)</b>   |                     |         |                      |               | <b>MLCL</b>  |                     |         |                      |                |        |       |       |       |
|                      |                     |         | Overall: 12.05       | 100.00        |              |                     |         | Overall: 8.48        | 99.12          |        |       |       |       |
|                      | CIII                | Rieske  | K44                  | 3.78          | 47.68        |                     | CIII    | Sub 8                | R24            | 7.11   | 41.72 |       |       |
|                      |                     |         | K51                  | 1.25          | 74.17        |                     |         |                      | S31            | 0.56   | 50.33 |       |       |
|                      |                     |         | W55                  | 3.91          | 49.23        |                     |         |                      | R156           | 15.00  | 76.60 |       |       |
|                      |                     | Sub 8   | K35                  | 9.80          | 81.02        |                     | CIV     | COX3                 | N157           | 9.02   | 83.22 |       |       |
|                      |                     |         | P36                  | 8.55          | 55.85        |                     |         |                      | H158           | 7.17   | 42.61 |       |       |
|                      |                     |         | L37                  | 9.06          | 47.02        |                     |         |                      | N160           | 15.00  | 58.50 |       |       |
|                      |                     | Sub 9   | S2                   | 0.95          | 93.38        |                     |         |                      | L223           | 15.00  | 81.02 |       |       |
|                      |                     |         | S4                   | 0.81          | 52.32        |                     |         |                      | COX5B          | S3     | 7.10  | 41.50 |       |
|                      |                     |         | S5                   | 2.17          | 66.89        |                     |         |                      | COX7A2L        | Y53    | 2.29  | 9.27  |       |
|                      | CIV                 | COX5A   | S93                  | 7.71          | 49.45        |                     |         |                      | S54            | 15.00  | 90.51 |       |       |
|                      |                     |         | K97                  | 9.27          | 71.97        |                     |         |                      | G55            | 15.00  | 80.57 |       |       |
|                      |                     |         |                      |               |              |                     |         |                      | K56            | 10.53  | 96.69 |       |       |
| <b>MLCL (Site 1)</b> |                     |         |                      |               | <b>Human</b> |                     |         |                      |                |        |       |       |       |
|                      |                     |         | Overall: 10.21       | 93.84         | <b>CL</b>    |                     |         |                      |                |        |       |       |       |
|                      | CIII                | Rieske  | K44                  | 4.36          | 76.91        |                     |         |                      | Overall: 15.00 | 100.00 |       |       |       |
|                      |                     |         | N46                  | 2.03          | 41.96        |                     | CIII    | Rieske               | R93            | 15.00  | 87.20 |       |       |
|                      |                     |         | K51                  | 1.66          | 68.77        |                     |         |                      | F113           | 15.00  | 77.70 |       |       |
|                      |                     | Sub 8   | K35                  | 6.12          | 63.95        |                     |         | Sub 4                | T305           | 15.00  | 41.72 |       |       |
|                      | CIV                 | COX1    | K408                 | 2.36          | 46.13        |                     |         |                      | H309           | 15.00  | 93.38 |       |       |
|                      |                     | COX5A   | G90                  | 1.98          | 41.71        |                     |         | Sub 8                | R25            | 15.00  | 97.79 |       |       |
|                      |                     |         | F94                  | 4.08          | 59.98        |                     |         |                      | A26            | 15.00  | 65.12 |       |       |
|                      |                     |         | K97                  | 6.49          | 61.52        |                     |         |                      | Y27            | 15.00  | 63.36 |       |       |
| <b>MLCL (Site 2)</b> |                     |         |                      |               | <b>MLCL</b>  |                     |         |                      |                |        |       |       |       |
|                      |                     |         | Overall: 15.10       | 100.00        |              |                     |         | Overall: 15.00       | 100.00         |        |       |       |       |
|                      | CIII                | Rieske  | K44                  | 14.06         | 73.82        |                     |         |                      | P28            | 2.29   | 49.67 |       |       |
|                      |                     |         | N46                  | 14.36         | 49.40        |                     |         |                      | H29            | 3.13   | 56.73 |       |       |
|                      |                     |         | K51                  | 1.24          | 71.42        |                     |         |                      | V30            | 1.71   | 43.27 |       |       |
|                      |                     |         | Y55                  | 6.64          | 61.75        |                     |         |                      | T32            | 2.37   | 59.16 |       |       |
|                      |                     | Sub 8   | K35                  | 13.30         | 94.28        |                     | CIV     | COX3                 | N157           | 3.02   | 75.94 |       |       |
|                      |                     |         | P36                  | 3.94          | 48.11        |                     |         |                      | Q158           | 15.00  | 83.44 |       |       |
|                      |                     |         | L37                  | 3.68          | 46.74        |                     |         |                      | A32            | 15.00  | 83.22 |       |       |
|                      |                     |         | Q38                  | 8.94          | 45.42        |                     |         | COX5B                | R36            | 15.00  | 81.24 |       |       |
|                      |                     |         | H42                  | 1.60          | 47.71        |                     |         | COX6A1               | K39            | 15.00  | 95.81 |       |       |
|                      | CIV                 | COX5A   | G90                  | 6.90          | 50.33        |                     |         |                      | Overall: 15.00 | 100.00 |       |       |       |
|                      |                     |         | S92                  | 3.69          | 48.17        |                     |         |                      | CIII           | Rieske | R93   | 15.00 | 90.95 |
|                      |                     |         | S93                  | 7.06          | 71.20        |                     |         |                      |                |        | F113  | 15.00 | 79.03 |
|                      |                     |         | F94                  | 7.07          | 72.09        |                     |         |                      |                | Sub 4  | T305  | 15.00 | 43.27 |
|                      |                     |         | K97                  | 12.81         | 87.01        |                     |         |                      |                |        | H309  | 15.00 | 92.27 |
|                      |                     |         |                      |               |              |                     |         |                      |                | Sub 8  | R25   | 15.00 | 98.23 |
|                      |                     |         |                      |               |              |                     |         |                      |                |        | A26   | 15.00 | 52.76 |
|                      |                     |         |                      |               |              |                     |         |                      |                |        | Y27   | 14.55 | 60.71 |
|                      |                     |         |                      |               |              |                     |         |                      |                |        | P28   | 3.46  | 57.62 |
|                      |                     |         |                      |               |              |                     |         |                      |                |        | H29   | 15.00 | 69.32 |
|                      |                     |         |                      |               |              |                     |         |                      |                |        | V30   | 1.44  | 47.02 |
|                      |                     |         |                      |               |              |                     |         |                      |                |        | T32   | 2.04  | 65.56 |
|                      |                     |         |                      |               |              |                     | CIV     | COX3                 | N157           | 3.82   | 75.28 |       |       |
|                      |                     |         |                      |               |              |                     |         |                      | Q158           | 15.00  | 80.57 |       |       |
|                      |                     |         |                      |               |              |                     |         |                      | Q161           | 2.35   | 44.15 |       |       |
|                      |                     |         |                      |               |              |                     |         |                      | COX5B          | A32    | 15.00 | 89.40 |       |
|                      |                     |         |                      |               |              |                     |         |                      | COX6A1         | R36    | 15.00 | 87.20 |       |
|                      |                     |         |                      |               |              |                     |         |                      |                |        | K39   | 15.00 | 95.14 |
